# Supplementary material
Source: Springer Nature journal article supplement (https://www.springermedizin.de/resource/supplementary/12970_2010_175_MOESM2_ESM.pdf/9594516)
Supplement: MOESM2 [file 9594516]

- Lodenafil
- Sildenafil citrate
- Tadalafil
- Vardenafil

Phosphodi-  
esterase  
(PDE5)  
inhibitors

- Sodium nitrite
- Nitroglycerin

Prescription  
drugs

Nutritional  
supplements  
(nitric oxide  
products)

Nitrate  
containing  
supplements

- NE2™
- Nitrox Pump
- NoX Rush
- NOX Surge

- NO-Xplode®
